# Supplementary material for: A UV/Vis Spectroscopy-Based Assay for Monitoring of Transformations Between Nucleosides and Nucleobases
Source: MDPI journal article supplement (doi:10.3390/mps2030060), 2019-07-15
Supplement: s1 [file s1]

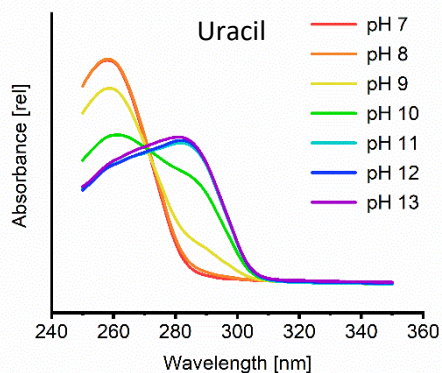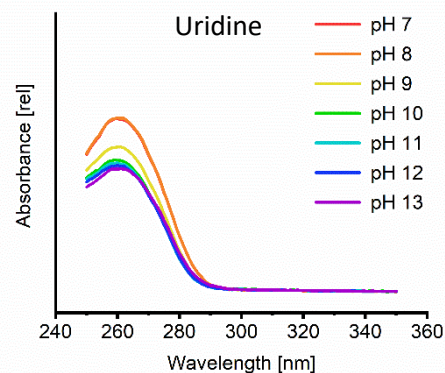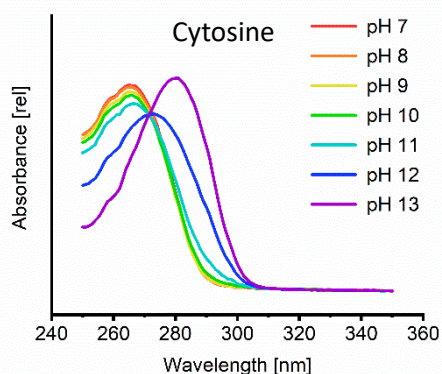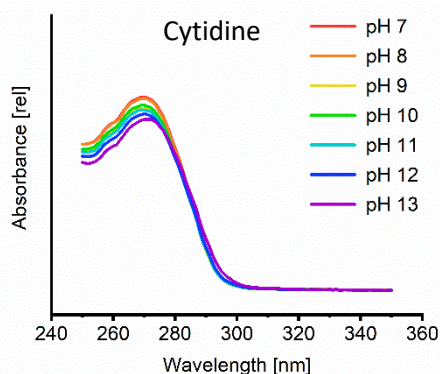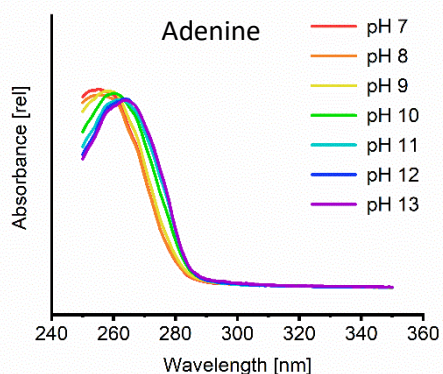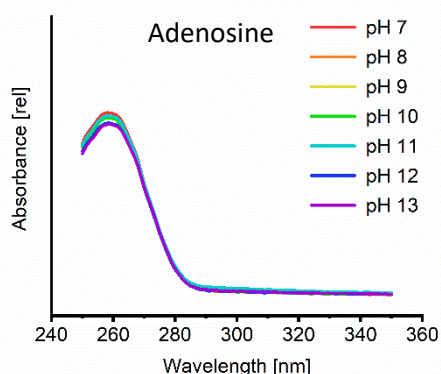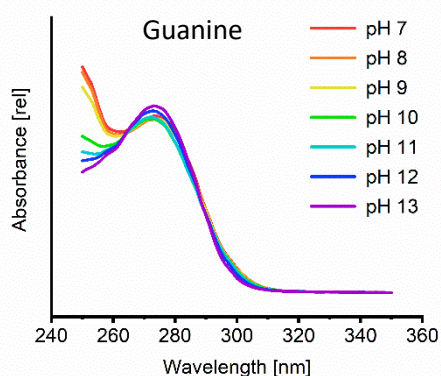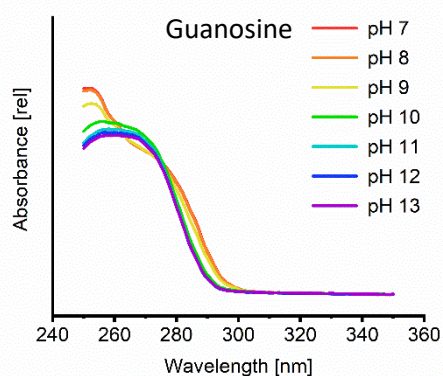

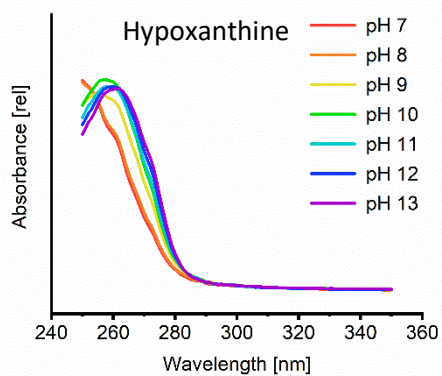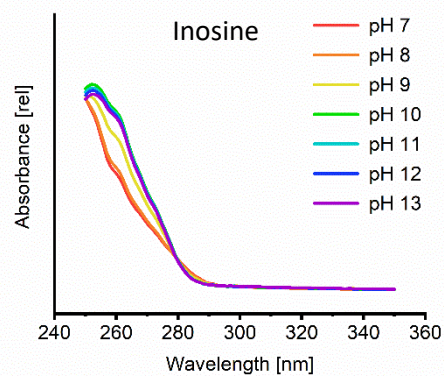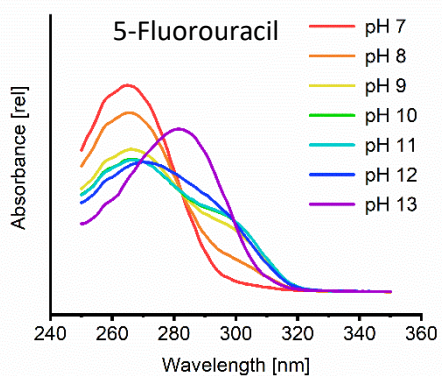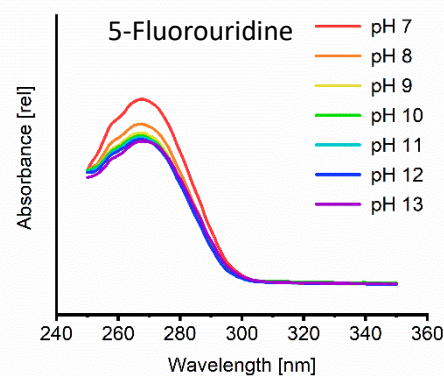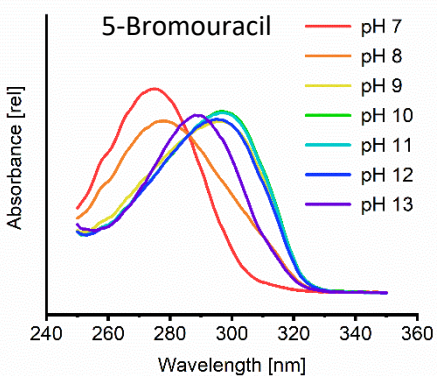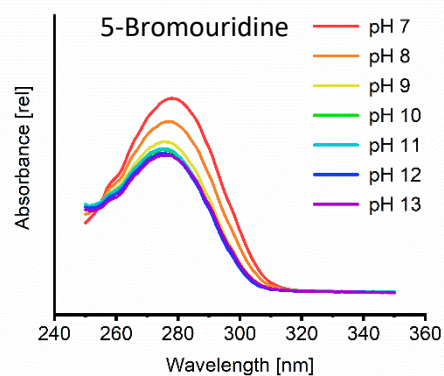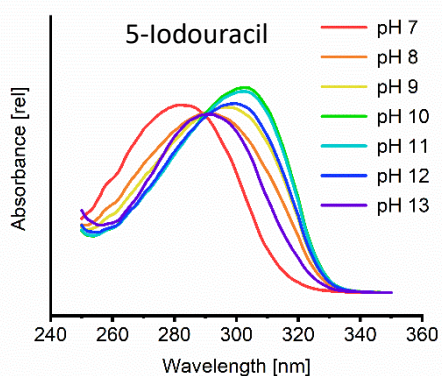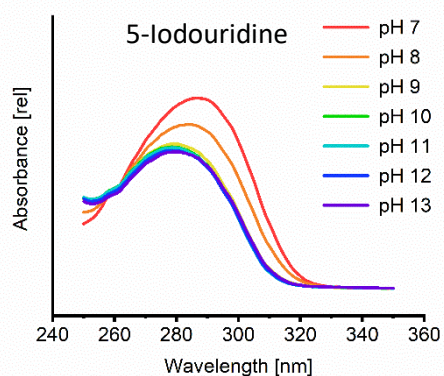

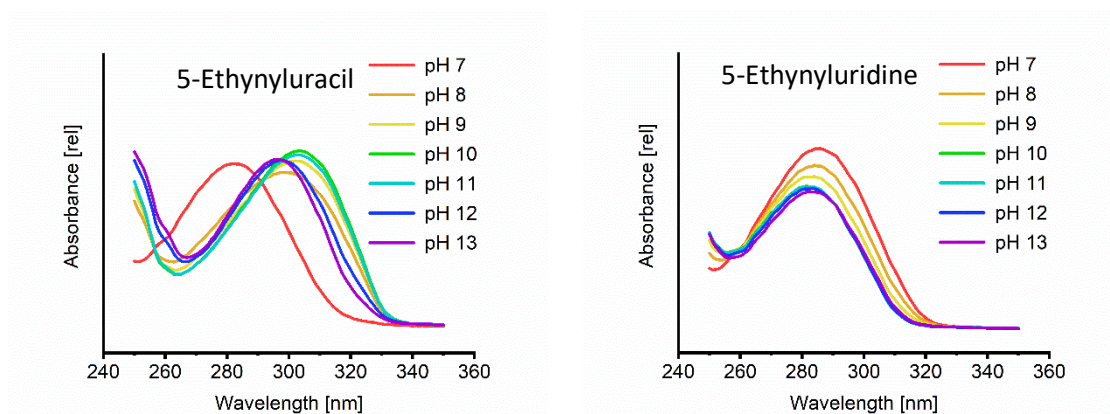

Figure S1 pH dependence of the UV/Vis-absorption spectra of the other nucleosides in this study.

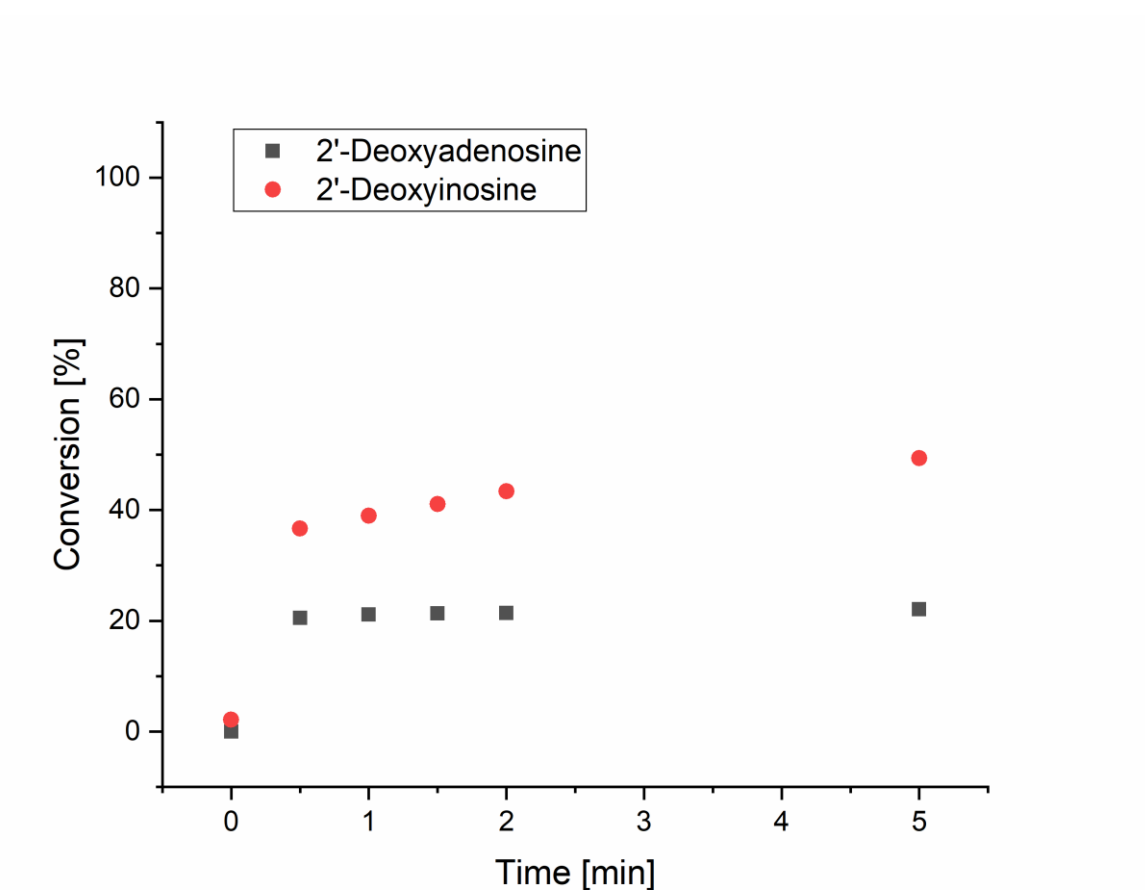

Figure S2 Phosphorylation of 2'-deoxyadenosine and 2'-deoxyinosine by Pu-NPase. The reactions were performed with 2 mM nucleoside, 10 mM  $K_2HPO_4$ , 16  $\mu$ g/mL Pu-NPase in 50 mM glycine buffer at pH 9 and 60 °C.
