# Supplementary material for: A UV/Vis Spectroscopy-Based Assay for Monitoring of Transformations Between Nucleosides and Nucleobases
Source: Methods Protoc. 2019 Jul 15;2(3):60. doi: 10.3390/mps2030060 (PMC6789650; doi:10.3390/mps2030060)
Supplement: Supplementary file 1 [file mps-02-00060-s001.zip]

Archive with 7 entries (7 files):
- Supplementary_Information__Kaspar_Giessmann_et_al_2019.pdf
- data_figure2.csv
- data_figure4.csv
- statistical_analysis_figure2.py
- statistical_analysis_figure2_results.txt
- statistical_analysis_figure4.py
- statistical_analysis_figure4_results.txt
