# Supplementary material for: A UV/Vis Spectroscopy-Based Assay for Monitoring of Transformations Between Nucleosides and Nucleobases
Source: Methods Protoc. 2019 Jul 15;2(3):60. doi: 10.3390/mps2030060 (PMC6789650; doi:10.3390/mps2030060)
Supplement: Supplementary file 1 [file mps-02-00060-s001.zip › data_figure2.csv]

Actual	predicted_Thd_1	predicted_Thd_2	predicted_Ado_1	predicted_Ado_2	predicted_5FUrd_1	predicted_5FUrd_2
0	2.49093345439362	0.452448245658654	9.2E-06	0.0791	7.56810170088329E-09	5.76116931938486E-10
20	20.7189687468687	20.2276472168123	21.0576460911311	21.2553304868386	20.5863677504166	21.9510525862471
40	39.5474679295294	39.3741115188103	40.4477800716114	41.546091408746	41.7879775553207	42.1117790278763
60	58.6142115090476	59.3648858427998	60.0358843896292	59.7401946607719	61.8109735362379	61.0179298966777
80	78.7734590921278	79.0431694695115	79.5794380737943	79.8337980566169	80.4742716608731	80.1625257722895
100	99.6982000452757	99.9999981230082	99.9996919469596	99.9969482421837	99.5667721643666	99.5575719195661
