# Supplementary material for: A UV/Vis Spectroscopy-Based Assay for Monitoring of Transformations Between Nucleosides and Nucleobases
Source: Methods Protoc. 2019 Jul 15;2(3):60. doi: 10.3390/mps2030060 (PMC6789650; doi:10.3390/mps2030060)
Supplement: Supplementary file 1 [file mps-02-00060-s001.zip › data_figure4.csv]

Actual	repl1_275300_meas1	repl1_275300_meas2	repl1_275300_meas3	repl1_fullspectrum_meas1	repl1_fullspectrum_meas2	repl1_fullspectrum_meas3	repl2_275300_meas1	repl2_275300_meas2	repl2_275300_meas3	repl2_fullspectrum_meas1	repl2_fullspectrum_meas2	repl2_fullspectrum_meas3
0	0.23373	0.60534	0.63047	0.99009	1.25409	1.01649	0.000143	0.13729	0.24526	0.62473	0.52474	0.51053
1	1.04098	0.95825	0.94939	1.56987	1.50272	1.40586	0.84117	1.02934	1.15678	1.44135	1.54323	1.59651
2	2.18019	2.3065	2.26582	2.82244	2.82243	2.66707	1.77099	1.71096	1.83845	2.33086	2.25169	2.16122
3							2.79086	2.71981	2.78281	3.22396	3.09589	3.02328
4	3.90806	3.89185	3.9278	4.4236	4.31062	4.11782	3.77989	3.733	3.69482	4.40331	4.08202	4.01824
5	4.90745	4.72647	4.6795	5.35742	5.1458	4.98622	4.60588	4.63675	4.6642	5.29766	5.11961	4.92499
