# Supplementary material for: A UV/Vis Spectroscopy-Based Assay for Monitoring of Transformations Between Nucleosides and Nucleobases
Source: Methods Protoc. 2019 Jul 15;2(3):60. doi: 10.3390/mps2030060 (PMC6789650; doi:10.3390/mps2030060)
Supplement: Supplementary file 1 [file mps-02-00060-s001.zip › statistical_analysis_figure2_results.txt]

Thd
    Actual  predicted
0        0   2.490933
1       20  20.718969
2       40  39.547468
3       60  58.614212
4       80  78.773459
5      100  99.698200
6        0   0.452448
7       20  20.227647
8       40  39.374112
9       60  59.364886
10      80  79.043169
11     100  99.999998
R Squared:
0.9990794980292134
 
Ado
    Actual  predicted
0        0   0.000009
1       20  21.057646
2       40  40.447780
3       60  60.035884
4       80  79.579438
5      100  99.999692
6        0   0.079100
7       20  21.255330
8       40  41.546091
9       60  59.740195
10      80  79.833798
11     100  99.996948
R Squared:
0.9995961294251426
 
5FUrd
    Actual     predicted
0        0  7.568102e-09
1       20  2.058637e+01
2       40  4.178798e+01
3       60  6.181097e+01
4       80  8.047427e+01
5      100  9.956677e+01
6        0  5.761169e-10
7       20  2.195105e+01
8       40  4.211178e+01
9       60  6.101793e+01
10      80  8.016253e+01
11     100  9.955757e+01
R Squared:
0.9987851377189947
