# Supplementary material for: A UV/Vis Spectroscopy-Based Assay for Monitoring of Transformations Between Nucleosides and Nucleobases
Source: Methods Protoc. 2019 Jul 15;2(3):60. doi: 10.3390/mps2030060 (PMC6789650; doi:10.3390/mps2030060)
Supplement: Supplementary file 1 [file mps-02-00060-s001.zip › statistical_analysis_figure4_results.txt]

--- PARTIAL ---
replicate:
repl1
who:
275300
RMSD:
0.286714729583


--- PARTIAL ---
replicate:
repl2
who:
275300
RMSD:
0.24427777932


--- TOTAL ---
who:
275300
RMSD:
0.264412983043


--- PARTIAL ---
replicate:
repl1
who:
fullspectrum
RMSD:
0.661576618702


--- PARTIAL ---
replicate:
repl2
who:
fullspectrum
RMSD:
0.358154981584


--- TOTAL ---
who:
fullspectrum
RMSD:
0.518570417509
